# Supplementary material
Source: publisher figshare collection journal article supplement (https://diabetesjournals.figshare.com/articles/dataset/_/13746730)
Supplement: Supplementary file 1 [file 2]

## SUPPLEMENTARY DATA

**SUPPLEMENTARY TABLE 1.- Distribution of treatment modalities according to healthcare-based country groups**

|                                 | TOTAL   | INJECTIONS-<br>NO SENSOR | INJECTIONS+<br>SENSOR | PUMP- NO<br>SENSOR | PUMP +<br>SENSOR |
|---------------------------------|---------|--------------------------|-----------------------|--------------------|------------------|
|                                 | N=25654 | N=9606                   | N=3843                | N=4418             | N=7787           |
|                                 | 24877   | 9329                     | 3785                  | 4174               | 7589             |
| Northern<br>Europe/Slovenia     | 6842    | 1463                     | 940                   | 2126               | 2313             |
|                                 |         | (21,38)                  | (13,74)               | (31,07)            | (33,81)          |
| Southern/Eastern Europe         | 5221    | 1988                     | 1269                  | 707                | 1257             |
|                                 |         | (38,08)                  | (24,31)               | (13,54)            | (24,07)          |
| Australia/Canada/New<br>Zealand | 3363    | 857                      | 754                   | 409                | 1343             |
|                                 |         | (25,48)                  | (22,42)               | (12,16)            | (39,94)          |
| Asia/Middle East/Africa         | 3890    | 3442                     | 200                   | 182                | 66               |
|                                 |         | (88,48)                  | (5,14)                | (4,68)             | (1,70)           |
| United States                   | 4873    | 950                      | 607                   | 736                | 2580             |
|                                 |         | (19,50)                  | (12,46)               | (15,10)            | (52,94)          |
| South America                   | 688     | 629                      | 15                    | 14                 | 30               |
|                                 |         | (91,42)                  | (2,18)                | (2,03)             | (4,37)           |

Results are expressed as number of subjects and percentage of total subjects within the respective country-group who used each modality. “Northern Europe/Slovenia” includes centers from: Austria, Belgium, Denmark, England, Germany, Ireland, Luxembourg, Netherlands, Norway, Slovenia, Sweden. “Southern/Eastern Europe” includes centers from: Bulgaria, Croatia, Czech Republic, France, Greece, Hungary, Italy, Lithuania, Poland, Portugal, Romania, Serbia and Spain.

**SUPPLEMENTARY TABLE 2.- Glycemic outcomes according to treatment modality and age group**

|                              | Injections-no<br>sensor | Injections<br>+sensor | Pump-no<br>sensor | Pump-Sensor   | p-value |
|------------------------------|-------------------------|-----------------------|-------------------|---------------|---------|
| HbA <sub>1c</sub> (mmol/mol) |                         |                       |                   |               |         |
| HbA <sub>1c</sub> (%)        |                         |                       |                   |               |         |
| [Q1, Q3]                     |                         |                       |                   |               |         |
| (n)                          |                         |                       |                   |               |         |
| < 12 years                   | 68.51±17.13             | 60.78±14.94           | 57.36±12.45       | 58.54±11.66   | <0.001  |
|                              | [57.08-76.95]           | [51.56-68.02]         | [48.91-63.70]     | [50.46-65.35] |         |
|                              | 8.42±1.56               | 7.71±1.36             | 7.40±1.14         | 7.51±1.07     |         |
|                              | [7.37-9.19]             | [6.87-8.37]           | [6.62-7.97]       | [6.77-8.13]   |         |
|                              | (3074)                  | (1332)                | (1289)            | (3116)        |         |
| 12-16 years                  | 74.60±22.62             | 66.43±18.65           | 63.62±16.53       | 63.80±15.08   | <0.001  |
|                              | [58.65-85.78]           | [54.87-73.84]         | [52.67-71.28]     | [53.77-70.83] |         |
|                              | 8.97±2.07               | 8.23±1.71             | 7.97±1.51         | 7.99±1.38     |         |
|                              | [7.51-9.99]             | [7.17-8.91]           | [6.97-8.67]       | [7.07-8.06]   |         |
|                              | (3257)                  | (1398)                | (1481)            | (2765)        |         |
| >16 years                    | 74.89±23.74             | 68.38±20.67           | 68.28±20.26       | 67.26±17.75   | <0.001  |
|                              | [58.18-86.88]           | [54.24-76.95]         | [54.72]           | [55.43-75.39] |         |
|                              | 9.0±2.17                | 8.41±1.89             | 8.40±1.85         | 8.30±1.62     |         |
|                              | [7.47-10.10]            | [7.11-9.19]           | [7.16-9.14]       | [7.22-9.04]   |         |
|                              | (2997)                  | (1086)                | (1601)            | (1857)        |         |
| DKA [%]                      |                         |                       |                   |               |         |
| (n)                          |                         |                       |                   |               |         |
| < 12 years                   | 0.03±0.18               | 0.02±0.13             | 0.02±0.14         | 0.02±0.14     | <0.001  |
|                              | (3168)                  | (1345)                | (1307)            | (3144)        |         |
| 12-16 years                  | 0.04±0.19               | 0.04±0.19             | 0.02±0.14         | 0.03±0.18     | 0.02    |
|                              | (3361)                  | (1411)                | (1495)            | (2778)        |         |
| >16 years                    | 0.03±0.18               | 0.04±0.19             | 0.02±0.15         | 0.03±0.18     | 0.02    |
|                              | (3077)                  | (1087)                | (1616)            | (1865)        |         |
| Severe Hypoglycemia [%]      |                         |                       |                   |               |         |
| (n)                          |                         |                       |                   |               |         |
| < 12 years                   | 0.02±0.15               | 0.03±0.18             | 0.01±0.09         | 0.03±0.16     | <0.001  |
|                              | (3168)                  | (1345)                | (1307)            | (3144)        |         |

|             |           |           |           |           |       |
|-------------|-----------|-----------|-----------|-----------|-------|
| 12-16 years | 0.02±0.14 | 0.05±0.22 | 0.02±0.13 | 0.02±0.15 | <0.01 |
|             | (3361)    | (1411)    | (1495)    | (2778)    |       |
| >16 years   | 0.03±0.16 | 0.06±0.23 | 0.01±0.12 | 0.03±0.18 | <0.01 |
|             | (3077)    | (1087)    | (1616)    | (1865)    |       |

Unadjusted HbA1c according to age groups (<12 years, 12-16 years, >16 years) and treatment modality groups. Data are given as median  $\pm$  standard deviation with quartiles [Q1; Q3]. Hospitalizations due to diabetic ketoacidosis (DKA) and episodes of severe hypoglycemia expressed as percentage of subjects having one episode of DKA or severe hypoglycemia during one year. Number of subjects (n) express the number of participants in each age-group and treatment modality. P-values for comparisons among different treatment modalities within each age group.

**SUPPLEMENTARY FIGURE 1. Outcome gender comparisons with reference group**

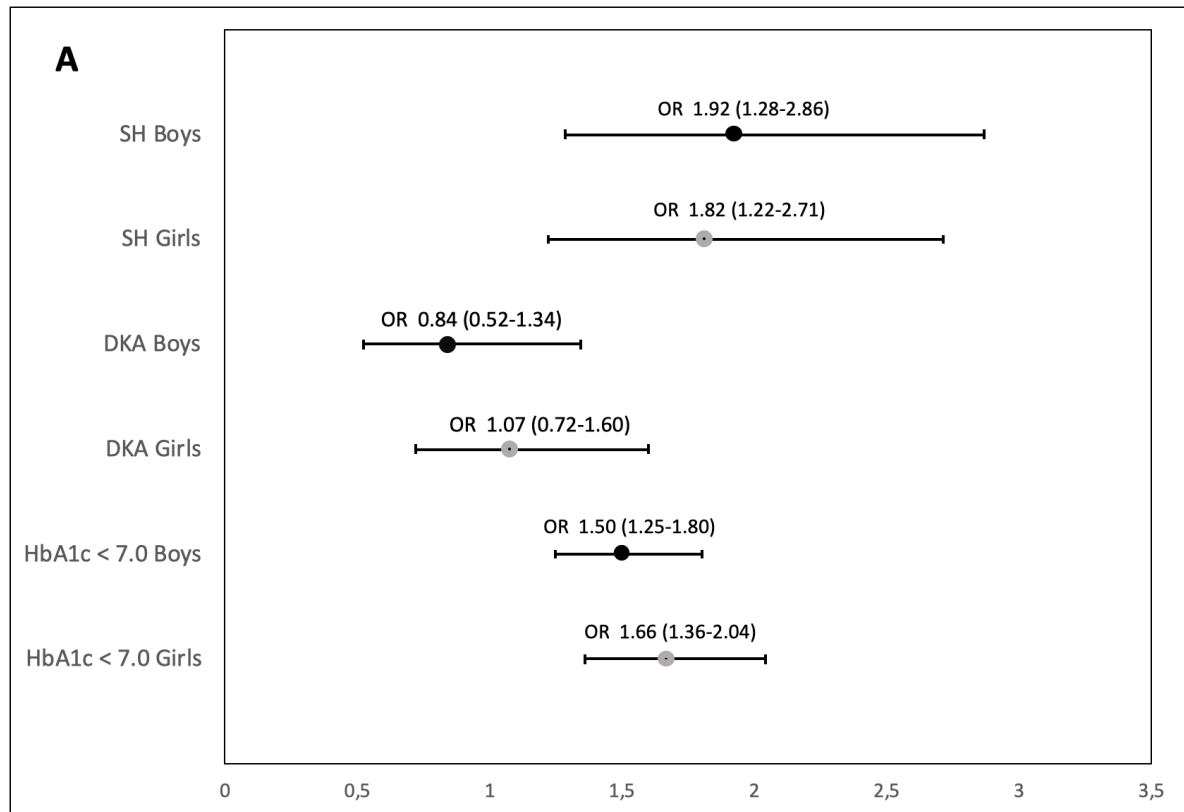

**B**

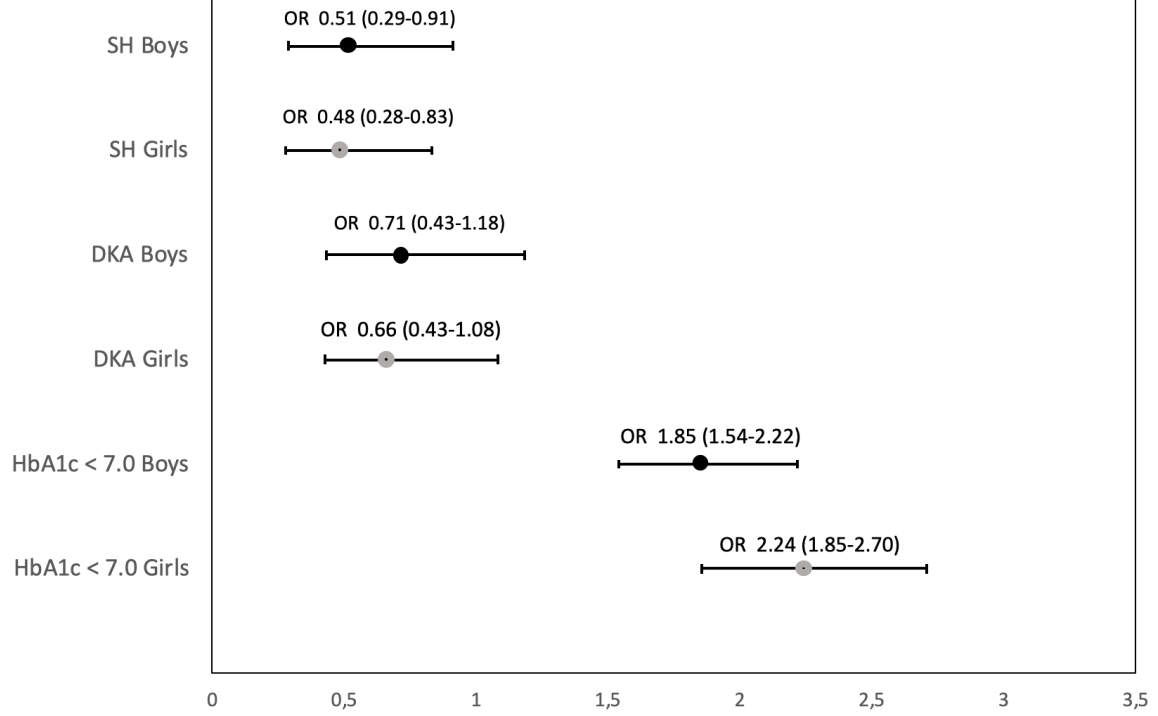

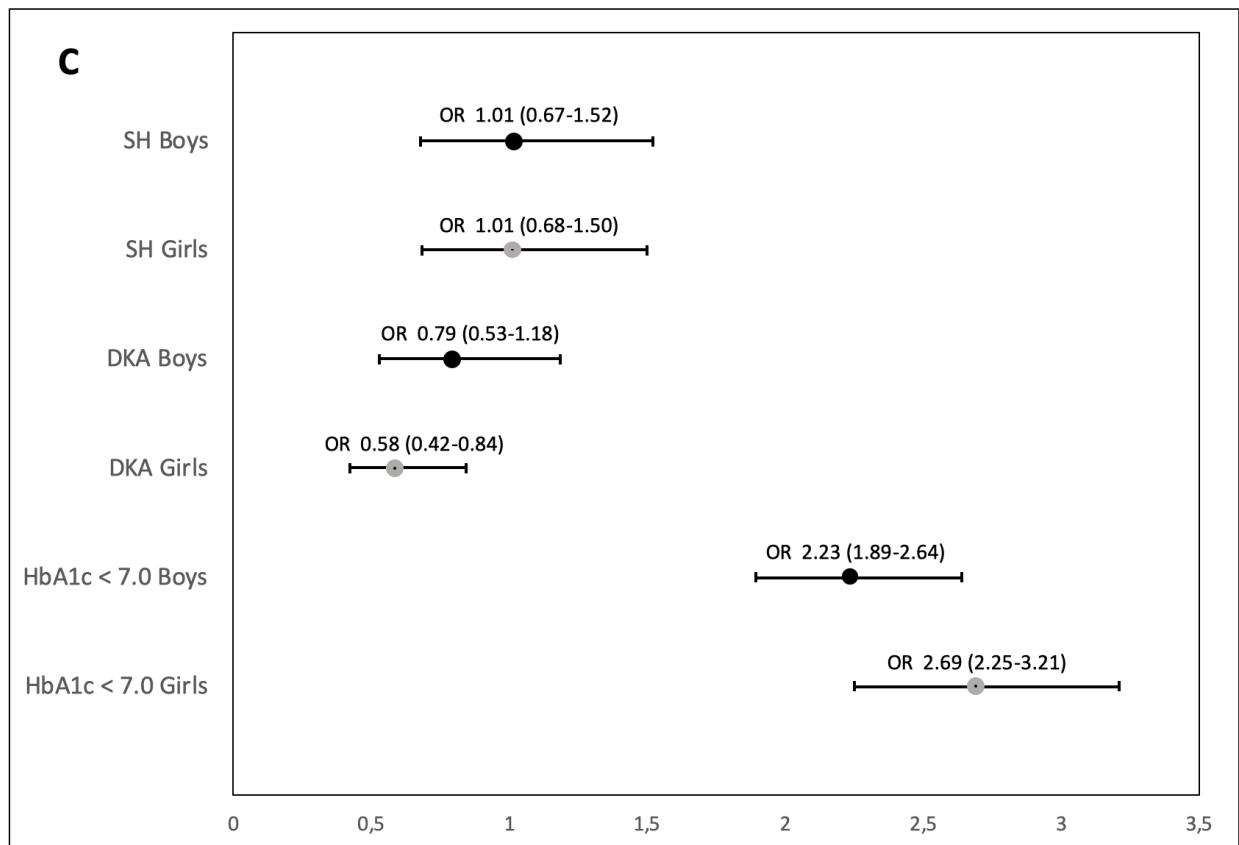

SUPPLEMENTAL FIG 1— Gender comparisons between injections+sensor group and the reference group injections-no sensor (A), pump-no sensor group and reference (B) and pump+sensor and the reference (C) for severe hypoglycemia according to ISPAD definition (SH), diabetic ketoacidosis according to ISPAD definition (DKA) and percentage of subjects achieving ISPAD 2018 target for HbA<sub>1c</sub> <7.0% [ $<53$  mmol/mol]. Odds ratios (OR) are represented by black circles in case of boys and light gray circles in case of girls (confidence interval 95%).
