# Supplementary material
Source: publisher figshare collection journal article supplement (https://diabetesjournals.figshare.com/articles/dataset/_/13746730)
Supplement: Supplementary file 2 [file 2]

## **SWEET STUDY GROUP CONTRIBUTING CENTERS**

Austria, Vienna: Universitätskinderklinik Wien, Belgium, Leuven: University Hospital Leuven (UZ Leuven), Bulgaria, Sofia: University Paediatric Hospital, Bulgaria, Varna: University Hospital St. Marina, Croatia, Zagreb: University Clinical Hospital Center Sestre milosrdnice, Croatia, Zagreb: University Hospital Zagreb, Czech Republic, Prague: University Hospital Motol Prague, Denmark, Aarhus: University of Aarhus, Denmark, Herlev: Herlev University Hospital, England, London: Barts and the London NHS Trust, England, Mansfield: Sherwood Forest Hospital, France, Angers: University Hospital Angers, France, Bordeaux: Centre Hospitalier Universitaire de Bordeaux, France, Paris: Hopital Necker Enfants Malades, Germany, Hannover: Kinderkrankenhaus Auf der Bult, Germany, Leverkusen: Klinikum Leverkusen - Kinderklinik, Greece, Athens: Athens University, Greece, Athens: P&A Kyriakou Children's Hospital, Greece, Thessaloniki: Hippokration Hospital of Thessaloniki, Greece, Thessaloniki: Papageorgiou General Hospital Thessaloniki, Hungary, Budapest: Semmelweis University, Ireland, Cork: Cork University Hospital, Ireland, Dublin: Our Lady's Children's Hospital, Italy, Ancona: Salesi University Hospital, Italy, Florence: Meyer Children Hospital, Italy, Rome: Bambino Gesù Children's Hospital, Italy, Verona: Università di Verona, Lithuania, Kaunas: Hospital of LUHS Kauno Klinikos, Luxembourg, Centre Hospitalier de Luxembourg, Netherlands, Rotterdam: Diabeter Clinic, Norway, Haugesund: Helse Fonna, Poland, Katowice: Medical University of Silesia, Poland, Opole: USK Opole, Poland, Rzeszow: University of Rzeszow, Pediatric Endocrinology and Diabetes, Poland, Warsaw: Medical University of Warsaw, Portugal, Coimbra: Hospital Pediatrico de Coimbra, Portugal, Lisbon, Estafania: Hospital Dona Estefania, Portugal, Lisbon: APDP-Portuguese Diabetes Association, Portugal, Porto: Centro Hospitalar S. Joao, Romania, Bucharest: Diabetes Nutrition and Metabolic Diseases Clinic DiabNutriMed, Romania, Buzias: Clinical Center Cristian Serban, Serbia, Belgrade: Institute for Mother and Child Healthcare, Slovenia, Ljubljana: University Children's Hospital, Spain, Barakaldo: Hospital Universitario Cruces, Spain, Barcelona: Hospital Sant Joan de Déu, Sweden, Gothenburg: The Queen Silvia Childrens Hospital, Sweden, Uddevalla: Uddevalla Children's Hospital, Bangladesh, Dhaka: BIRDEM, Diabetic Association of Bangladesh, Congo, Brazzaville: General Hospital Adolphe Sice, Egypt, Cairo: Ain Shams University, Egypt, Cairo: Diabetes & Neuropathy Clinic, India, Ahmedabad: Swasthya Diabetes Care, India, Ahmedabad: Arogyam Health Care, India, Ahmedabad: Diacare Clinic, India, Aurangabad: Sarda centre for diabetes and selfcare, India, Belgaum: KLE University's Jawaharlal Nehru Medical College, India, Chennai: MV Diabetes center, India, Coimbatore: PSG institute of medical sciences, India, Jaipur: Galaxy Speciality Center, India, Kanpur: Center for Diabetes & Endocrine Diseases, India, Kota Rajasthan: Ramchandani Diabetes Care and Research Centre, India, Sangli: Grow Kids Endocrine Clinic Sangli, Iran, Shiraz: Shiraz University of Medical Sciences, Japan, Osaka: Department of Pediatrics Osaka City University Graduate School, Korea, Seongnam: Seoul National University Bundang Hospital, Kuwait, Kuwait City: Dasman Institute, Mali, Bamako: NGO Santé Diabète / Hopital du Mali, Mauritius, Vacoas: T1Diams, Morocco, Rabat: Children's Hospital - Unit Of Pediatric Diabetology, Pakistan, Lahore: WeCare Medical Centre, Tanzania, Darassalam: Muhimbili National Hospital, Turkey, Duzce: University of Duzce, Department of Pediatric Endocrinology, Turkey, Ege University Faculty of Medicine, Australia, Geelong: Granada Medical Centre, Australia, Perth: Princess Margaret Hospital for Children, Australia, Queensland: South

East Queensland Private Practice Group, Australia, Woolloongabba: Queensland Paediatric Endocrinology, New Zealand, Auckland: Auckland Starship Hospital, Canada, Calgary: Alberta Health Services, Canada, Markham: Markham Stouffville Hospital, Canada, Sherbrooke: Sherbrooke University, Canada, Vancouver: British Columbia Children's Hospital, USA, Cincinnati: Cincinnati Children's, USA, Denver Colorado: Barbara Davis Center, USA, Stanford: Lucile Packard Children's Hospital, Argentina, Buenos Aires: Hospital Juan P. Garrahan, Brasil, Curitiba: Centro de Diabetes Curitiba, Chile, San Felipe: Hospital San Camilo, Costa Rica, San Jose: National Children's Hospital, Hospital CIMA, Ecuador, Quito: Fundación Diabetes Juvenil Ecuador,
